# Supplementary material
Source: HighWire-hosted journal article supplement (https://www.rcpjournals.org/highwire/filestream/10996/field_highwire_adjunct_files/0/Wingfield_Supplementary_S1.pdf)
Supplement: Wingfield_Supplementary_S1.pdf [file Wingfield_Supplementary_S1.pdf]

# General Information

---

This is a quality improvement project to centralise documentation of external advice calls to the Infectious Diseases service at Royal Liverpool and Broadgreen University Hospital NHS Trust and to improve continuity of advice given.

**Title of Project** Improving continuity of advice from a regional Infectious Diseases department for external hospital trusts and General Practitioners

**Aim**

- 1) Centralise information from clinical referrals for advice and/or transfer from other hospitals or from Primary Care
- 2) Improve continuity of virtual care and advice from Infectious Diseases department at Royal Liverpool for people who are not currently inpatients
- 3) Improve documentation in line with good clinical practice, accountability and to potentially help medico-legal process
- 4) Create database for calls taken which would be useful for audit purposes, posters and annual review

**Rationale** Regional tertiary referral centres receive regular calls from other hospitals and primary care facilities to discuss patients' cases for specialist advice and/or referral for further management (be that as an outpatient or inpatient). Sometimes, to give comprehensive advice on an evolving clinical scenario requires a number of virtual consultations and discussions.

In the Infectious Diseases department at Royal Liverpool Hospital, no central system of documentation exists for these calls. This means that the Infectious Disease physician (usually a specialist registrar) who is holding the bleep and receives the call will usually make their own notes but these will be inaccessible to other members of the team. Anecdotally, when multiple different Infectious Diseases specialist registrars have been contacted over a period of time without prior knowledge or accessible advice notes, this has made giving advice difficult and lacking in continuity, which could be potentially hazardous for both the patient (physically) and the medical teams involved (medico-legally).

After consultation with the Infectious Diseases specialist registrars at Royal Liverpool Hospital, it was decided to create a centralised database in which advice given to GPs or external hospitals could be documented for our own records and for other specialist registrars to access if required.

This data will be used to evaluate the advice that the Infectious Diseases department gives over time (call volume, referrers, diagnoses, etc). In addition, the opinions of the Infectious Diseases registrars on continuity of advice calls given will be assessed prior to and after implementing the centralised database.

**Tags** Quality improvement; infectious diseases external advice calls; continuity of care

**Location** Tropical and Infectious Diseases Unit

**Project Lead** Tom Wingfield

**Executive Sponsor**

**Team Members** Tom Wingfield

# Driver Diagram

Main aims, primary drivers, and secondary drivers of the Quality Improvement Project.

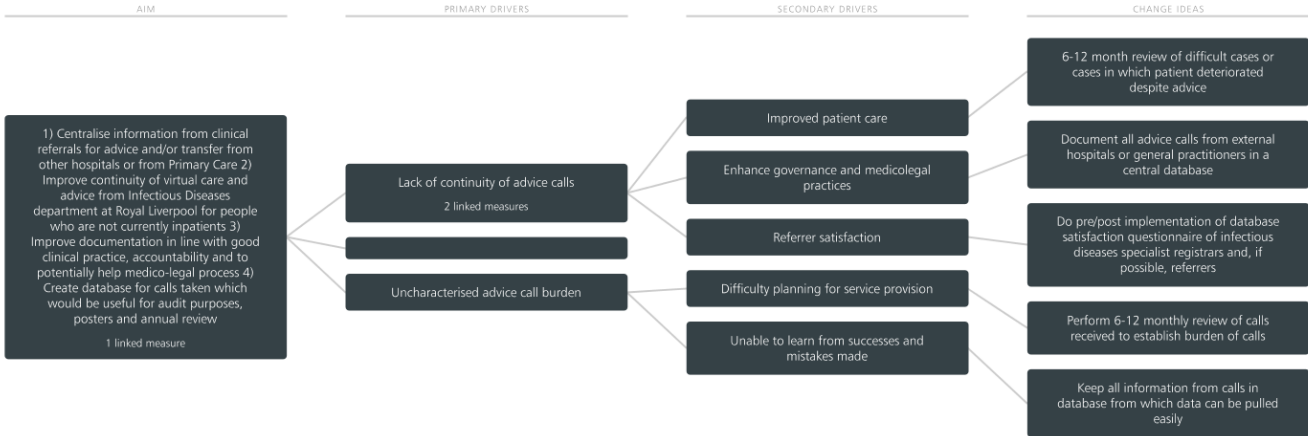



# Measures

---

Measures include Infectious Disease Specialist Registrars' satisfaction with the documentation system, and the number of overall calls and, specifically, follow-up calls made to the service.

## Measures with a type of Process:

|             |                                                                                                                                                                                                                                                                                                                                                                                                                                                                                                                                               |
|-------------|-----------------------------------------------------------------------------------------------------------------------------------------------------------------------------------------------------------------------------------------------------------------------------------------------------------------------------------------------------------------------------------------------------------------------------------------------------------------------------------------------------------------------------------------------|
| Description | Number of calls logged in advice call documentation database                                                                                                                                                                                                                                                                                                                                                                                                                                                                                  |
| Linked To   | <p>Aim – 1) Centralise information from clinical referrals for advice and/or transfer from other hospitals or from Primary Care</p> <p>2) Improve continuity of virtual care and advice from Infectious Diseases department at Royal Liverpool for people who are not currently inpatients</p> <p>3) Improve documentation in line with good clinical practice, accountability and to potentially help medico-legal process</p> <p>4) Create database for calls taken which would be useful for audit purposes, posters and annual review</p> |

## Measures with a type of Outcome:

|             |                                                          |
|-------------|----------------------------------------------------------|
| Description | ID SpR satisfaction improvement following implementation |
| Linked To   | Primary driver – Lack of continuity of advice calls      |

## Measures with a type of Balance:

|             |                                                              |
|-------------|--------------------------------------------------------------|
| Description | Review how many advice calls documented had a follow-up call |
| Linked To   | Primary driver – Lack of continuity of advice calls          |

# Change Ideas

---

The Project aims to perform 6-12 monthly review of the calls received and conduct pre- and post-implementation satisfaction questionnaires.

|                  |                                                                                                  |
|------------------|--------------------------------------------------------------------------------------------------|
| Description      | Document all advice calls from external hospitals or general practitioners in a central database |
| Secondary Driver | Enhance governance and medicolegal practices                                                     |
| PDSAs            |                                                                                                  |

|                  |                                                                                  |
|------------------|----------------------------------------------------------------------------------|
| Description      | Keep all information from calls in database from which data can be pulled easily |
| Secondary Driver | Unable to learn from successes and mistakes made                                 |
| PDSAs            |                                                                                  |

|                  |                                                                            |
|------------------|----------------------------------------------------------------------------|
| Description      | Perform 6-12 monthly review of calls received to establish burden of calls |
| Secondary Driver | Difficulty planning for service provision                                  |
| PDSAs            |                                                                            |

|                  |                                                                                                                                                                                                                                                                         |
|------------------|-------------------------------------------------------------------------------------------------------------------------------------------------------------------------------------------------------------------------------------------------------------------------|
| Description      | Do pre/post implementation of database satisfaction questionnaire of infectious diseases specialist registrars and, if possible, referrers                                                                                                                              |
| Secondary Driver | Referrer satisfaction                                                                                                                                                                                                                                                   |
| PDSAs            | To measure change in satisfaction of ID SpRs in how they document their advice calls using the current system (individualised note taking, verbal handover, and sporadic written handover) versus following the implementation of a centralised documentation database. |

Description  
deteriorated despite advice

6-12 month review of difficult cases or cases in which patient

Secondary Driver

Improved patient care

PDSAs

# PDSA Cycles

This section will be completed once the database has been implemented, feedback has been given, and satisfaction rates collated.

## Define

|                    |                                                                                                                                                                                                                                                                         |
|--------------------|-------------------------------------------------------------------------------------------------------------------------------------------------------------------------------------------------------------------------------------------------------------------------|
| <b>Aim</b>         | To measure change in satisfaction of ID SpRs in how they document their advice calls using the current system (individualised note taking, verbal handover, and sporadic written handover) versus following the implementation of a centralised documentation database. |
| <b>Change Idea</b> | Do pre/post implementation of database satisfaction questionnaire of infectious diseases specialist registrars and, if possible, referrers                                                                                                                              |
| <b>When</b>        | 13/07/2017                                                                                                                                                                                                                                                              |
| <b>Who</b>         | Tom Wingfield                                                                                                                                                                                                                                                           |
| <b>Where</b>       | Royal Liverpool and Broadgreen University Hospitals NHS Trust                                                                                                                                                                                                           |

## Plan

|                 |                                                                                                                                                                                                                                                                                                                    |
|-----------------|--------------------------------------------------------------------------------------------------------------------------------------------------------------------------------------------------------------------------------------------------------------------------------------------------------------------|
| <b>Predict</b>  | Satisfaction rates for the documentation of advice calls will improve and the perception of better continuity of advice among ID SpRs                                                                                                                                                                              |
| <b>Tasks</b>    | Abstract/poster at QIP meeting and presentation to ID department<br><hr/> Surveymonkey post-implementation questionnaire<br><hr/> Collect feedback on initial documentation and make new Access database<br><hr/> Design initial documentation file in Word<br><hr/> Surveymonkey pre-implementation questionnaire |
| <b>Measures</b> |                                                                                                                                                                                                                                                                                                                    |



Do

Study

Act
